# Supplementary material for: Pilot Study of 3D Spatial Distribution of α-Pinene Emitted by Norway Spruce (L.) Karst Recently Infested by Ips typographus (L. 1758) (Coleoptera: Scolytinae)
Source: MDPI journal article supplement (doi:10.3390/f15010010), 2023-12-20
Supplement: s1 [file s1]

## Supplementary Materials

**Table S1 The averages of the temperature and humidity in the first data collection June 30<sup>th</sup> 2022 in a two times collections (SPME and cartridge collection).**

| First field trip 30.6.2022 |              | Sampling SPME (14:00-15:00) | Sampling Cartridges (15:30-16:30) |
|----------------------------|--------------|-----------------------------|-----------------------------------|
| tree 1.3m                  | Temp [°C]    | 26.3                        | 26.0                              |
|                            | Humidity [%] | 67.6                        | 67.5                              |
| tree 4m                    | Temp [°C]    | 25.2                        | 25.7                              |
|                            | Humidity [%] | 69.8                        | 71.8                              |
| S_control                  | Temp [°C]    | 25.3                        | 25.3                              |
|                            | Humidity [%] | 71.3                        | 70.4                              |
| W_control                  | Temp [°C]    | 24.7                        | 25.1                              |
|                            | Humidity [%] | 72.7                        | 71.2                              |
| SE_control                 | Temp [°C]    | 24.8                        | 25.1                              |
|                            | Humidity [%] | 69.2                        | 69.2                              |

**Table S2 The averages of the temperature and humidity in the second data collection August 24<sup>th</sup> 2022 in a two times collections (SPME and cartridge collection).**

| Second field trip 24.8.2022 |              | SPME sampling (12:10-12:25) | Cartridges sampling (16:00-16:15) |
|-----------------------------|--------------|-----------------------------|-----------------------------------|
| tree 1.3m                   | Temp [°C]    | 20.0                        | 21.0                              |
|                             | Humidity [%] | 85.8                        | 61.5                              |
| tree 4m                     | Temp [°C]    | 19.6                        | 21.0                              |
|                             | Humidity [%] | 84.0                        | 61.5                              |
| W_control                   | Temp [°C]    | 20.4                        | 22.1                              |
|                             | Humidity [%] | 81.8                        | 82.3                              |
| N_control                   | Temp [°C]    | 20.1                        | 21.3                              |
|                             | Humidity [%] | 83.3                        | 90.3                              |

Logging area [ha]

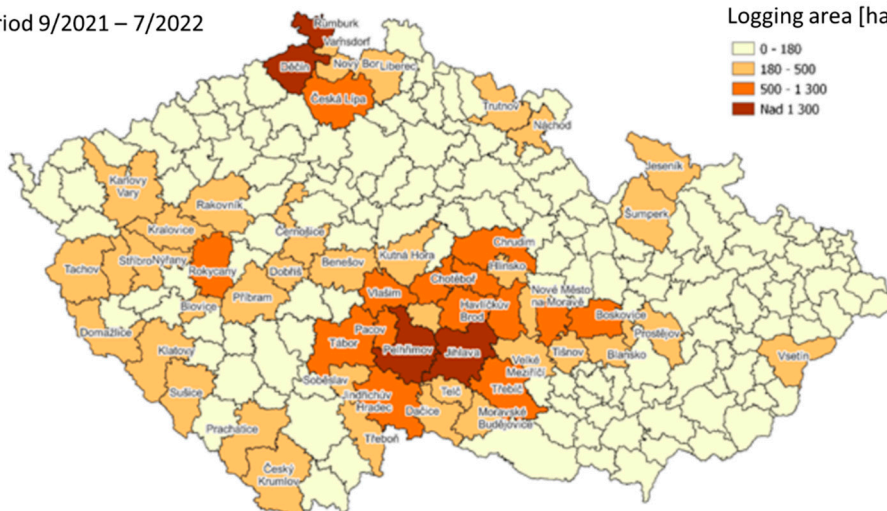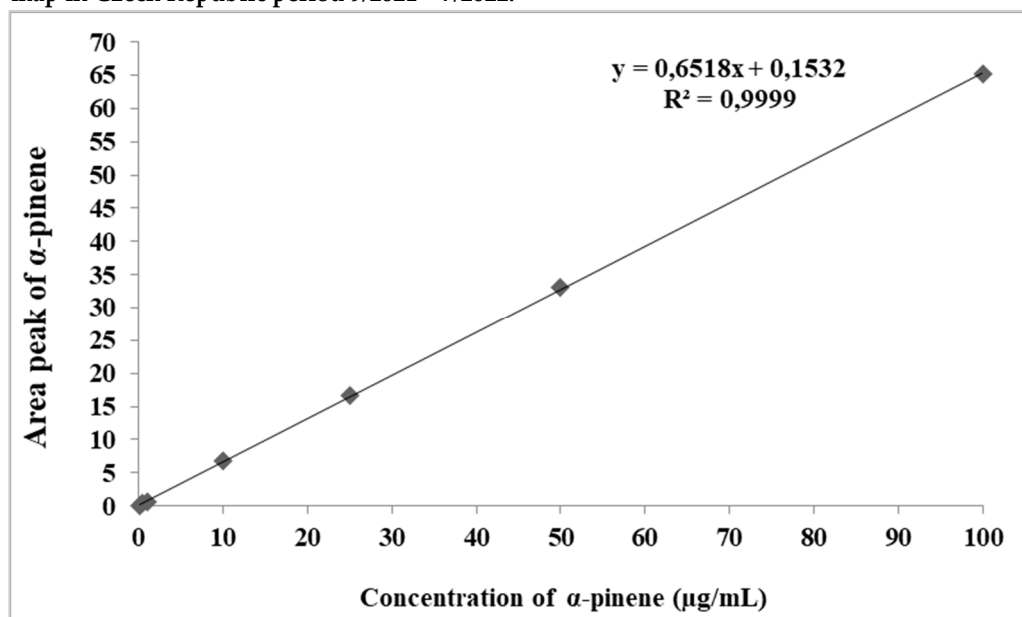

**Figure S2 Calibration curve of  $\alpha$ -pinene.** Constructed using commercial standard of  $\alpha$ -pinene diluted in hexane at 0.1; 0.5; 1; 10; 25; 50 and 100  $\mu\text{g/mL}$ .
